# Supplementary material for: Retrospective View of North American Potato (Solanum tuberosum L.) Breeding in the 20th and 21st Centuries
Source: PubMed Central journal article supplement (PMC3689798; doi:10.1534/g3.113.005595), 2013-06-01
Supplement: supp_g3.113.005595_005595SI.pdf [file supp_g3.113.005595_005595SI.pdf]

## Retrospective View of North American Potato (*Solanum tuberosum* L.) Breeding in the 20<sup>th</sup> and 21<sup>st</sup> Centuries

Candice N. Hirsch<sup>\*</sup>, Cory D. Hirsch<sup>\*</sup>, Kimberly Felcher<sup>§</sup>, Joseph Coombs<sup>§</sup>, Dan Zarka<sup>§</sup>, Allen Van Deynze<sup>†</sup>, Walter De Jong<sup>‡</sup>, Richard E. Veilleux<sup>\*\*</sup>, Shelley Jansky<sup>§§,††</sup>, Paul Bethke<sup>§§,††</sup>, David S. Douches<sup>§</sup>, C. Robin Buell<sup>\*</sup>.

<sup>\*</sup>Department of Plant Biology, Michigan State University, East Lansing, MI, 48824

<sup>§</sup>Department of Plant, Soil and Microbial Sciences, Michigan State University, East Lansing, MI, 48824

<sup>†</sup>Seed Biotechnology Center, University of California, Davis, CA, 95616

<sup>‡</sup>Department of Plant Breeding & Genetics, Cornell University, Ithaca, NY, 14853

<sup>\*\*</sup>Department of Horticulture, Virginia Polytechnic Institute and State University, Blacksburg, VA, 24061

<sup>§§</sup>Department of Horticulture, University of Wisconsin, Madison, WI, 53706

<sup>††</sup>United States Department of Agriculture-Agricultural Research Service, Vegetable Crops Research Unit, Madison, Wisconsin, 53706

DOI: 10.1534/g3.113.005595

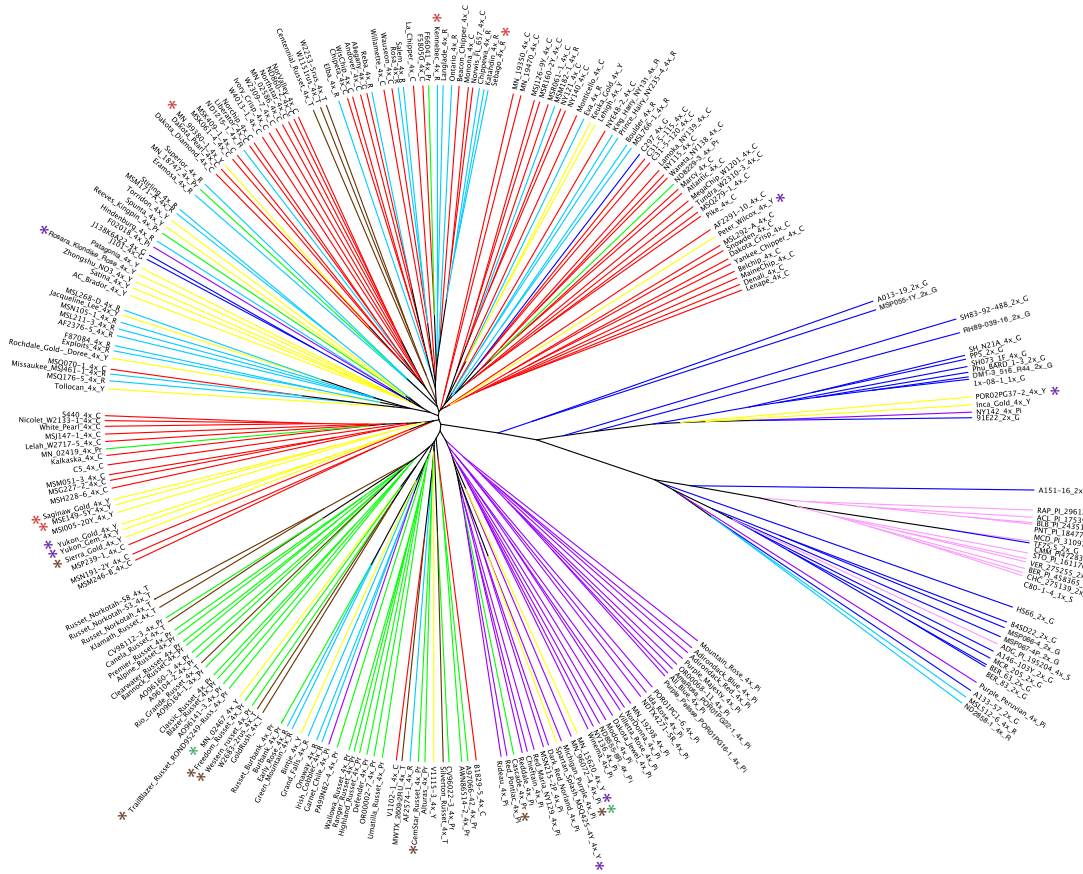

**Figure S1** Unweighted pair group method with arithmetic mean (UPGMA) tree of 250 potato lines based on 3,763 single nucleotide polymorphism markers with dosage genotype calls and individual lines labeled. Color-coding is based on predominant market class designation and asterisks indicate lines that can be classified into more than one market class (red – Chip Processing; dark blue – Genetic Stock; purple – Pigmented; green - French Fry Processing; light blue – Round White Table; pink – Wild Species; brown – Table Russet; yellow – Yellow).

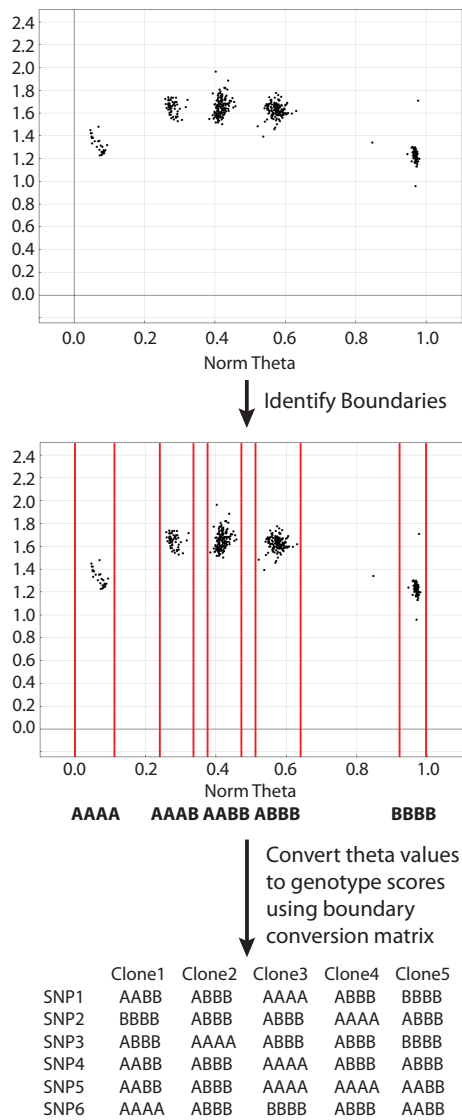

**Figure S2** Workflow used to determine dosage genotype scores.

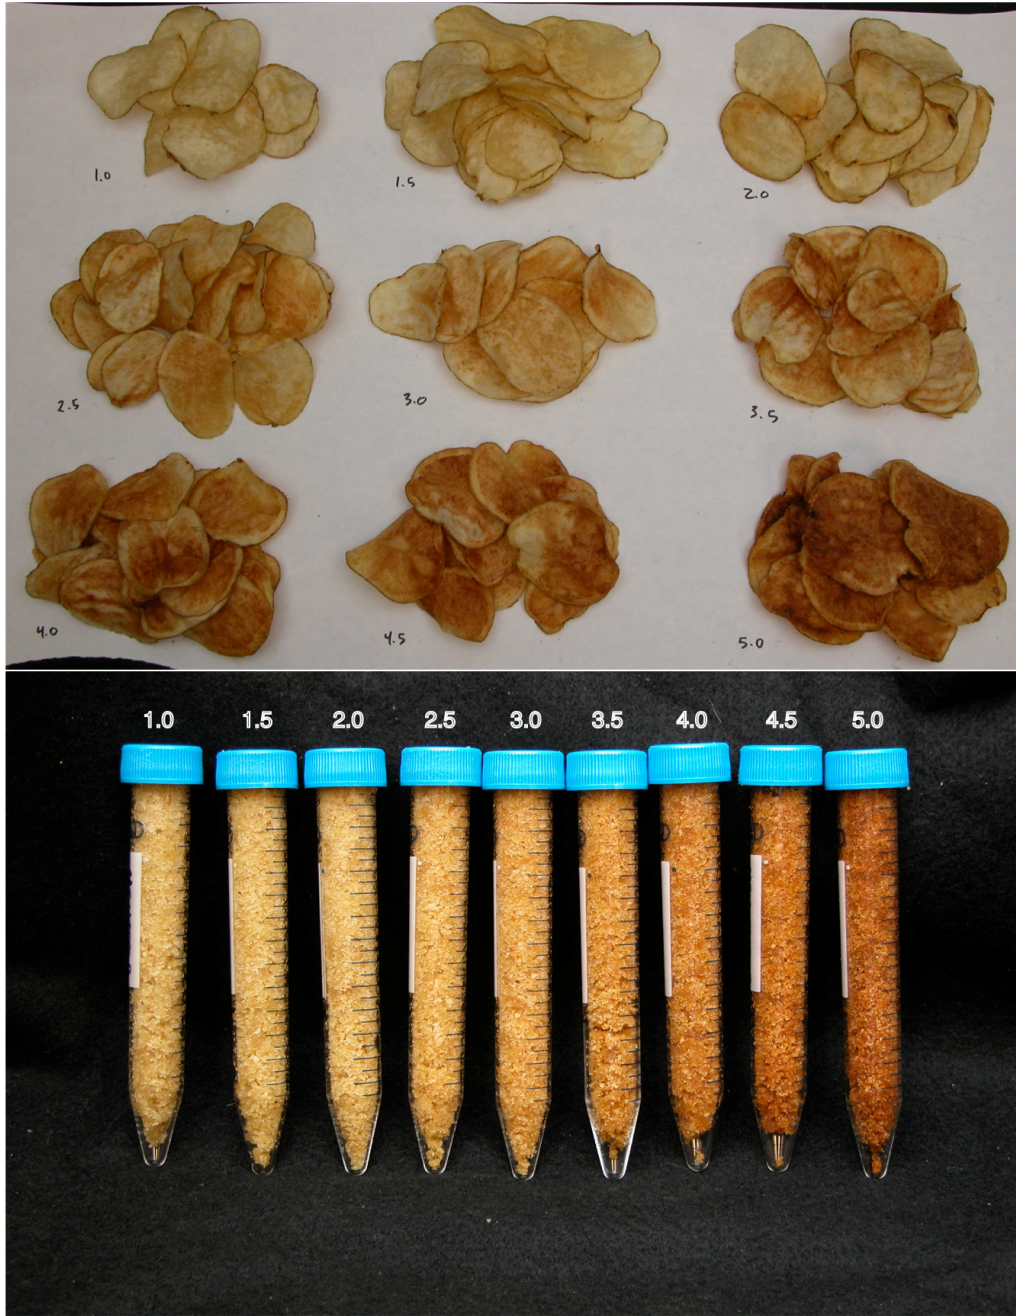

**Figure S3** Snack Food Association (SFA) chip color measurement standard.

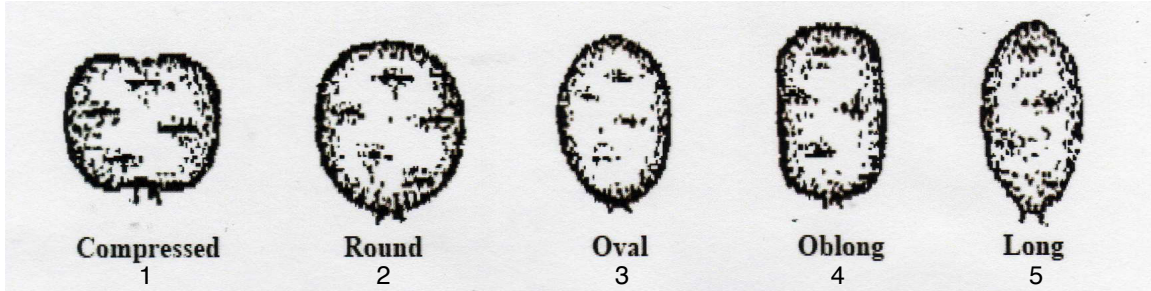

**Figure S4** Tuber shape measurement standard.

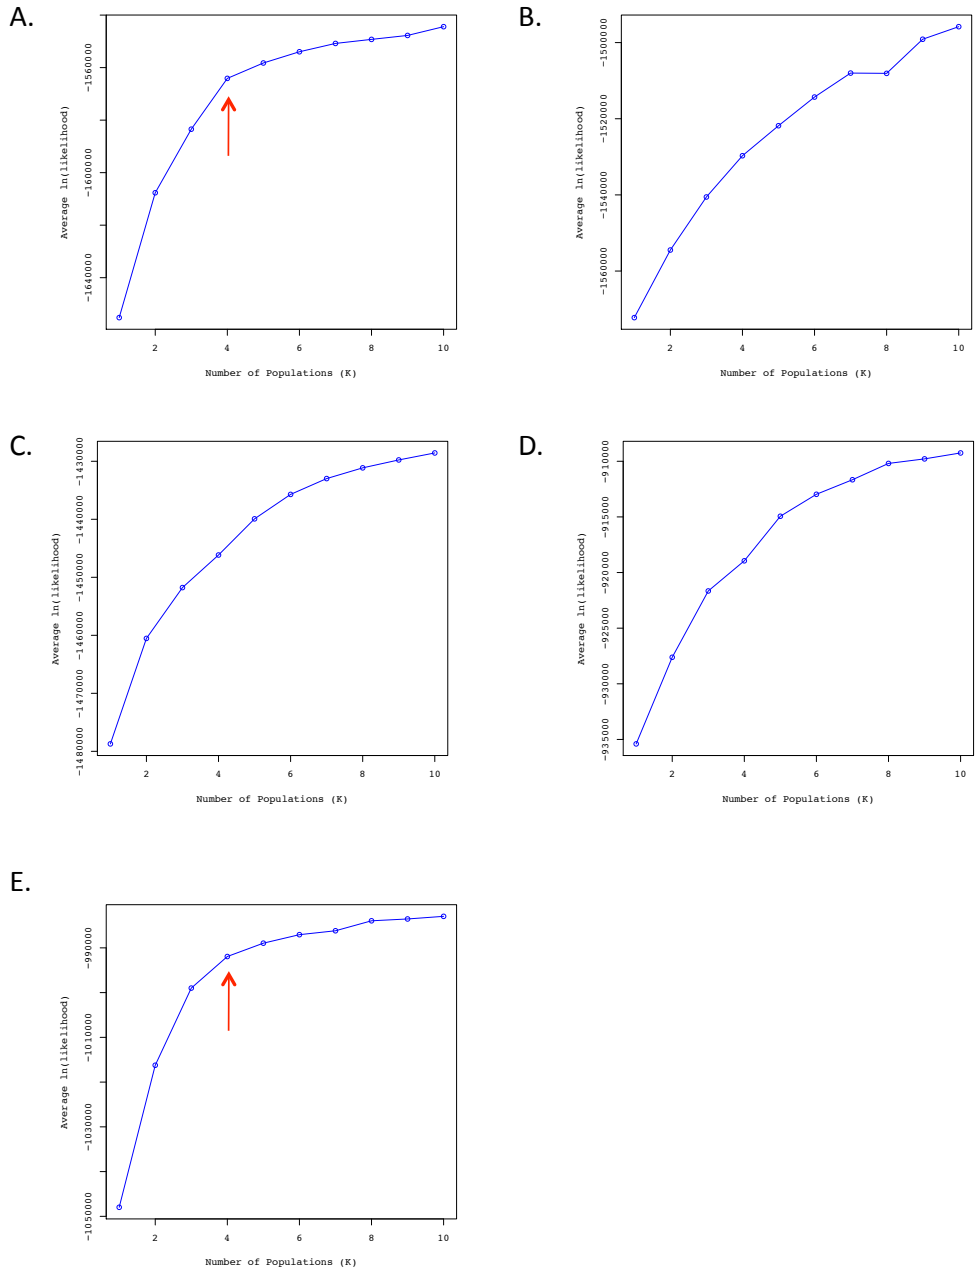

**Figure S5** Average likelihood estimates from STRUCTURE with varying  $K$  (number of populations) values. STRUCTURE was run on multiple datasets, and likelihood estimates are shown for (A) diploid dataset, (B) tetraploid as tetraploid dataset, (C) tetraploid as diploid dataset, (D) tetraploid as diploid subset, and (E) diploid subset. The red arrows indicate the inflection points in each graph if a clear inflection point was observed.

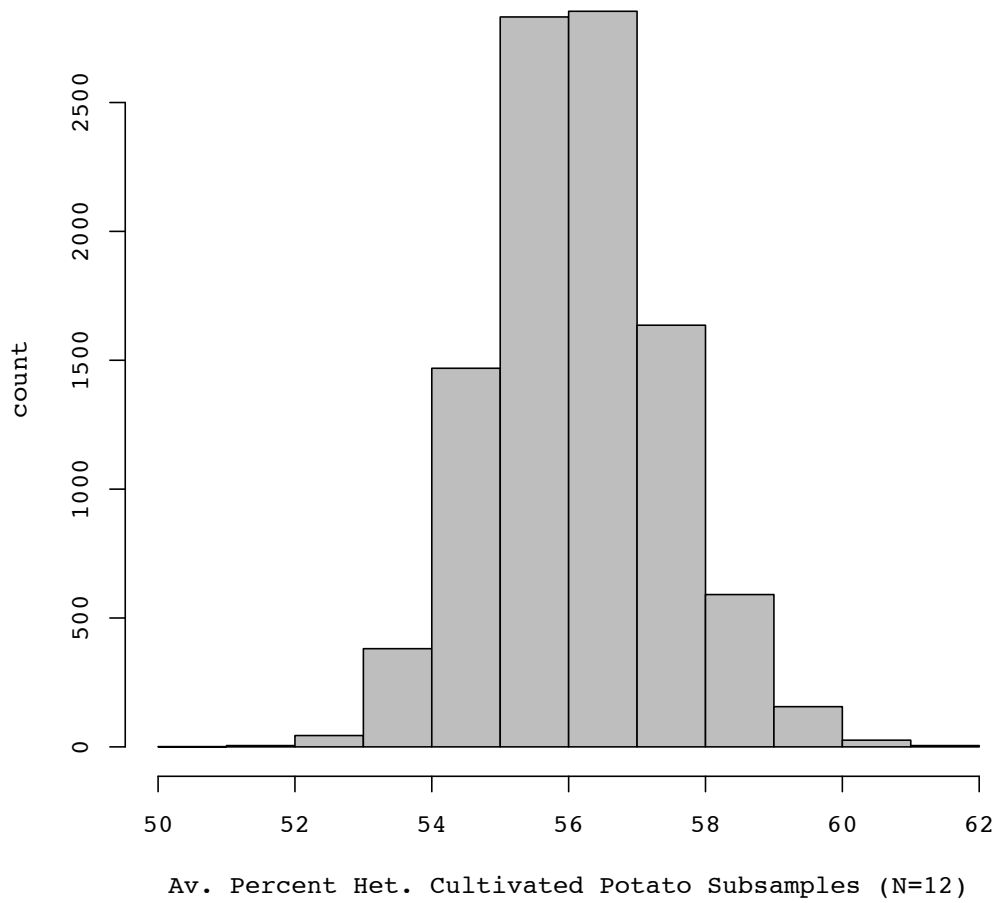

**Figure S6** Histogram of average percent heterozygosity in subsamples (N=12) of the cultivated potato clones. Sub-sampling was performed with replacement 10,000 times.

**File S1** Summary of STRUCTURE validation testing the effects of varying marker number, genotype method, and germplasm included in the analysis.

STRUCTURE (PRITCHARD *et al.* 2000) analysis was conducted with only the tetraploid clones (221 clones) using the dosage genotyping model (AAAA, AAAB, AABB, ABBB, BBBB; 3,763 markers) to evaluate if subpopulations exist within cultivated potato that could not be resolved due to the inclusion of Genetic Stock and Wild Species in the previous analysis. However, no inflection point was observed in the maximum likelihood graphs with a maximum  $K$  value of 10 (Figure S5B). In addition to removing the Genetic Stock and Wild Species, this analysis used a subset of the markers and dosage genotyping calls. To confirm that the lack of observed structure was not from either of these variables, analysis of the tetraploid clones was repeated using the diploid genotyping model (AA, AB, BB) with all of the markers that could be scored (6,373 markers; Figure S5C) and with the subset of markers that dosage genotyping could be called on (3,763 markers; Figure S5D) and again no inflection point was observed. However, repeating the analysis with the entire panel (250 clones) using the diploid genotyping model but only with the subset of markers that dosage genotyping could be called on (3,763 markers) a clear inflection point was again observed for  $K=4$  (Figure S5E).

PRITCHARD, J. K., M. STEPHENS and P. DONNELLY, 2000 Inference of population structure using multilocus genotype data. *Genetics* **155**: 945-959.



**Table S1** Species, population structure grouping, market class, ploidy level, and release year information for 250 diverse potato lines. Population structure was determined using STRUCTURE with 6,373 SNP markers.

Table S1 is available for download as a xlsx file at

<http://www.g3journal.org/lookup/suppl/doi:10.1534/g3.113.005595/-/DC>.

**Table S2** Dosage cluster calling boundaries for the Potato 8,303 Infinium SNP Chip for the 5,031 SNPs whose dosage boundaries could be determined. NA indicates that the boundary for a specific marker class (AAAA, ABBB, AABB, ABBB, BBBB) could not be clearly determined.

Table S2 is available for download as a XLSX file at

<http://www.g3journal.org/lookup/suppl/doi:10.1534/g3.113.005595/-/DC>.

**Table S3** Genotype scores for 6,373 single nucleotide polymorphism markers on 250 lines using a diploid model (AA, AB, BB).

Table S3 is available for download as a XLSX file at

<http://www.g3journal.org/lookup/suppl/doi:10.1534/g3.113.005595/-/DC>.

**Table S4** Genotype scores for 3,763 single nucleotide polymorphism markers on 250 lines using a dosage model (monoploid – A and B; diploid AA, AB, and BB; tetraploid AAAA, AAAB, AABB, ABBB, and BBBB).

Table S4 is available for download as a XLSX file at

<http://www.g3journal.org/lookup/suppl/doi:10.1534/g3.113.005595/-/DC>.

**Table S5** Single nucleotide polymorphisms (SNPs) in carotenoid biosynthetic pathway genes and random SNPs tested for significant differences in allele or genotype composition compared to that observed in all other cultivated potato lines. Bold numbers indicate significance at p-value $\leq$ 0.05.

| SNP Type   | SNP Name            | PGSC Gene            | Annotation                                                           | Allele Frequency p-value | Genotype Frequency p-value |
|------------|---------------------|----------------------|----------------------------------------------------------------------|--------------------------|----------------------------|
| Carotenoid | solcap_snp_c2_13431 | PGSC0003DMG400013335 | alternative oxidase                                                  | 0.503                    | 0.622                      |
| Carotenoid | solcap_snp_c1_12691 | PGSC0003DMG400028897 | beta-carotene hydroxylase                                            | <b>0.006</b>             | <b>0.005</b>               |
| Carotenoid | solcap_snp_c2_45240 | PGSC0003DMG400008159 | lycopene beta cyclase, chloroplastic                                 | 0.976                    | 0.886                      |
| Carotenoid | solcap_snp_c2_45242 | PGSC0003DMG400008159 | lycopene beta cyclase, chloroplastic                                 | 0.917                    | 0.648                      |
| Carotenoid | solcap_snp_c2_45244 | PGSC0003DMG400008159 | lycopene beta cyclase, chloroplastic                                 | 0.875                    | 0.668                      |
| Carotenoid | solcap_snp_c2_51559 | PGSC0003DMG400010637 | lycopene beta cyclase, chloroplastic                                 | 0.802                    | 0.222                      |
| Carotenoid | solcap_snp_c2_51560 | PGSC0003DMG400010637 | lycopene beta cyclase, chloroplastic                                 | 0.220                    | <b>0.045</b>               |
| Carotenoid | solcap_snp_c2_37118 | PGSC0003DMG400009156 | phytoene dehydrogenase, chloroplastic/chromoplastic                  | 0.345                    | 0.195                      |
| Carotenoid | solcap_snp_c2_37121 | PGSC0003DMG400009156 | phytoene dehydrogenase, chloroplastic/chromoplastic                  | 0.070                    | <b>0.035</b>               |
| Carotenoid | solcap_snp_c1_9060  | PGSC0003DMG400028224 | carotenoid isomerase, chloroplastic                                  | 0.131                    | 0.417                      |
| Carotenoid | solcap_snp_c2_29741 | PGSC0003DMG400028224 | carotenoid isomerase, chloroplastic                                  | 0.589                    | 0.051                      |
| Carotenoid | solcap_snp_c1_5286  | PGSC0003DMG400022473 | zeta-carotene desaturase                                             | <b>0.010</b>             | 0.239                      |
| Carotenoid | solcap_snp_c2_16424 | PGSC0003DMG400022473 | zeta-carotene desaturase                                             | 0.236                    | 0.070                      |
| Carotenoid | solcap_snp_c2_16425 | PGSC0003DMG400022473 | zeta-carotene desaturase                                             | 0.217                    | <b>0.011</b>               |
| Carotenoid | solcap_snp_c2_16426 | PGSC0003DMG400022473 | zeta-carotene desaturase                                             | <b>0.019</b>             | 0.300                      |
| Carotenoid | solcap_snp_c2_27926 | PGSC0003DMG400000333 | lycopene epsilon cyclase                                             | 0.687                    | 0.723                      |
| Carotenoid | solcap_snp_c2_27929 | PGSC0003DMG400000333 | lycopene epsilon cyclase                                             | 0.438                    | <b>0.031</b>               |
| Carotenoid | solcap_snp_c2_27930 | PGSC0003DMG400000333 | lycopene epsilon cyclase                                             | 0.512                    | 0.363                      |
| Random     | solcap_snp_c1_13189 | PGSC0003DMG400022953 | pyruvate decarboxylase                                               | 0.370                    | 0.360                      |
| Random     | solcap_snp_c1_4990  | PGSC0003DMG400010454 | transitional endoplasmic reticulum ATPase                            | 0.356                    | 0.123                      |
| Random     | solcap_snp_c2_11479 | PGSC0003DMG400027738 | GTP-binding protein                                                  | 0.829                    | 0.384                      |
| Random     | solcap_snp_c2_11758 | PGSC0003DMG400000810 | serine-threonine protein kinase, plant-type                          | 0.604                    | 0.524                      |
| Random     | solcap_snp_c2_15332 | PGSC0003DMG400008081 | auxin response factor                                                | 0.171                    | 0.326                      |
| Random     | solcap_snp_c2_15342 | PGSC0003DMG400008081 | auxin response factor                                                | 0.122                    | 0.313                      |
| Random     | solcap_snp_c2_19537 | PGSC0003DMG400013943 | conserved gene of unknown function                                   | 0.194                    | <b>0.032</b>               |
| Random     | solcap_snp_c2_22003 | PGSC0003DMG400032243 | homocysteine s-methyltransferase                                     | <b>0.017</b>             | 0.065                      |
| Random     | solcap_snp_c2_23942 | PGSC0003DMG400000994 | calcium-dependent protein kinase 3                                   | 0.925                    | 0.222                      |
| Random     | solcap_snp_c2_34    | -                    | -                                                                    | 0.527                    | 0.740                      |
| Random     | solcap_snp_c2_35055 | PGSC0003DMG400009380 | receptor protein kinase CLAVATA1                                     | <b>0.017</b>             | <b>0.020</b>               |
| Random     | solcap_snp_c2_36264 | PGSC0003DMG400013391 | conserved gene of unknown function                                   | 0.721                    | 0.792                      |
| Random     | solcap_snp_c2_46455 | PGSC0003DMG400025176 | non-symbiotic hemoglobin                                             | 0.908                    | 0.474                      |
| Random     | solcap_snp_c2_55863 | PGSC0003DMG400023897 | self-pruning G-box protein                                           | 0.079                    | 0.562                      |
| Random     | solcap_snp_c2_9003  | -                    | -                                                                    | 0.267                    | 0.847                      |
| Random     | solcap_snp_c1_15926 | PGSC0003DMG400022947 | uncharacterized aarF domain-containing protein kinase, chloroplastic | <b>0.003</b>             | 0.062                      |
| Random     | solcap_snp_c2_20569 | PGSC0003DMG400028985 | calcium ion binding protein                                          | 0.849                    | 0.262                      |
| Random     | solcap_snp_c2_49451 | PGSC0003DMG400001685 | acyl carrier protein                                                 | 0.252                    | 0.296                      |

**Table S6** Single nucleotide polymorphisms (SNPs) in carbohydrate degradation, synthesis, transport, and regulation genes tested for significant differences in allele or genotype composition compared to that observed in all other cultivated potato lines.

Table S6 is available for download as a XLSX file at

<http://www.g3journal.org/lookup/suppl/doi:10.1534/g3.113.005595/-/DC>.

**Table S7** Single nucleotide polymorphisms (SNPs) in glycoalkaloid biosynthetic pathway candidate genes and random SNPs throughout the genome tested for significant differences in allele or genotype composition between the Wild Species and cultivated potato lines. Analysis was done using the diploid genotyping model. Bold numbers indicate significance at  $p\text{-value} \leq 0.05$ .

| SNP Type      | SNP                 | Chr   | Position | PGSC Gene            | Annotation                                             | Allele Frequency p-value | Genotype Frequency p-value |
|---------------|---------------------|-------|----------|----------------------|--------------------------------------------------------|--------------------------|----------------------------|
| Glycoalkaloid | solcap_snp_c1_15972 | chr02 | 15346371 | PGSC0003DMG400003461 | 3-hydroxy-3-methylglutaryl coenzyme A reductase (HMG2) | <b>0.0005</b>            | <b>0.0000</b>              |
| Glycoalkaloid | solcap_snp_c1_15975 | chr02 | 15348125 | PGSC0003DMG400003461 | 3-hydroxy-3-methylglutaryl coenzyme A reductase (HMG2) | <b>0.0043</b>            | <b>0.0004</b>              |
| Glycoalkaloid | solcap_snp_c1_9696  | chr02 | 21888552 | PGSC0003DMG400003324 | squalene epoxidase (SQE)                               | <b>0.0000</b>            | <b>0.0000</b>              |
| Glycoalkaloid | solcap_snp_c2_32413 | chr02 | 21888699 | PGSC0003DMG400003324 | squalene epoxidase (SQE)                               | <b>0.0007</b>            | <b>0.0000</b>              |
| Glycoalkaloid | solcap_snp_c2_32414 | chr02 | 21889615 | PGSC0003DMG400003324 | squalene epoxidase (SQE)                               | 0.1855                   | 0.1691                     |
| Glycoalkaloid | solcap_snp_c2_32417 | chr02 | 21892360 | PGSC0003DMG400003324 | squalene epoxidase (SQE)                               | <b>0.0000</b>            | <b>0.0000</b>              |
| Glycoalkaloid | solcap_snp_c2_23391 | chr07 | 39727554 | PGSC0003DMG400011749 | UDP-galactose:solanidine galactosyltransferase (SGT1)  | <b>0.0057</b>            | <b>0.0008</b>              |
| Glycoalkaloid | solcap_snp_c2_23390 | chr07 | 39727884 | PGSC0003DMG400011749 | UDP-galactose:solanidine galactosyltransferase (SGT1)  | 0.1921                   | 0.0894                     |
| Glycoalkaloid | solcap_snp_c2_23389 | chr07 | 39727960 | PGSC0003DMG400011749 | UDP-galactose:solanidine galactosyltransferase (SGT1)  | <b>0.0004</b>            | 0.0788                     |
| Glycoalkaloid | solcap_snp_c2_23388 | chr07 | 39728034 | PGSC0003DMG400011749 | UDP-galactose:solanidine galactosyltransferase (SGT1)  | 0.2698                   | <b>0.0258</b>              |
| Glycoalkaloid | solcap_snp_c2_23385 | chr07 | 39728475 | PGSC0003DMG400011749 | UDP-galactose:solanidine galactosyltransferase (SGT1)  | <b>0.0000</b>            | <b>0.0000</b>              |
| Glycoalkaloid | solcap_snp_c2_23384 | chr07 | 39728673 | PGSC0003DMG400011749 | UDP-galactose:solanidine galactosyltransferase (SGT1)  | 0.3493                   | 0.3404                     |
| Glycoalkaloid | solcap_snp_c2_23383 | chr07 | 39728724 | PGSC0003DMG400011749 | UDP-galactose:solanidine galactosyltransferase (SGT1)  | 0.8660                   | <b>0.0007</b>              |
| Glycoalkaloid | solcap_snp_c2_23382 | chr07 | 39728727 | PGSC0003DMG400011749 | UDP-galactose:solanidine galactosyltransferase (SGT1)  | 0.9184                   | <b>0.0008</b>              |
| Glycoalkaloid | solcap_snp_c2_23381 | chr07 | 39728817 | PGSC0003DMG400011749 | UDP-galactose:solanidine galactosyltransferase (SGT1)  | <b>0.0068</b>            | <b>0.0000</b>              |
| Glycoalkaloid | solcap_snp_c2_49600 | chr08 | 35218101 | PGSC0003DMG400017508 | UDP-glucose:solanidine glucosyltransferase (SGT2)      | <b>0.0010</b>            | <b>0.0000</b>              |
| Glycoalkaloid | solcap_snp_c2_49601 | chr08 | 35218300 | PGSC0003DMG400017508 | UDP-glucose:solanidine glucosyltransferase (SGT2)      | <b>0.0003</b>            | <b>0.0000</b>              |
| Glycoalkaloid | solcap_snp_c2_49602 | chr08 | 35218570 | PGSC0003DMG400017508 | UDP-glucose:solanidine glucosyltransferase (SGT2)      | <b>0.0001</b>            | <b>0.0000</b>              |
| Glycoalkaloid | solcap_snp_c2_49604 | chr08 | 35219038 | PGSC0003DMG400017508 | UDP-glucose:solanidine glucosyltransferase (SGT2)      | 0.0732                   | <b>0.0420</b>              |
| Random        | solcap_snp_c2_20569 | chr01 | 60048382 | PGSC0003DMG400028985 | Calcium ion binding protein                            | <b>0.0005</b>            | <b>0.0000</b>              |
| Random        | solcap_snp_c2_49451 | chr01 | 61451309 | PGSC0003DMG400001685 | Acyl carrier protein                                   | <b>0.0011</b>            | <b>0.0000</b>              |
| Random        | solcap_snp_c2_46455 | chr01 | 78455375 | PGSC0003DMG400025176 | Non-symbiotic                                          | <b>0.0142</b>            | <b>0.0040</b>              |

|        |                     |       |          |                      |                                                                      |               |               |
|--------|---------------------|-------|----------|----------------------|----------------------------------------------------------------------|---------------|---------------|
|        |                     |       |          |                      | hemoglobin                                                           |               |               |
| Random | solcap_snp_c2_55863 | chr02 | 19615327 | PGSC0003DMG400023897 | Self-pruning G-box protein                                           | <b>0.0000</b> | <b>0.0000</b> |
| Random | solcap_snp_c2_36264 | chr03 | 582345   | PGSC0003DMG400013391 | Conserved gene of unknown function                                   | <b>0.0016</b> | <b>0.0000</b> |
| Random | solcap_snp_c2_11479 | chr04 | 5352996  | PGSC0003DMG400027738 | GTP-binding protein                                                  | 0.3522        | <b>0.0000</b> |
| Random | solcap_snp_c2_11758 | chr05 | 1997209  | PGSC0003DMG400000810 | Serine-threonine protein kinase, plant-type                          | <b>0.0019</b> | <b>0.0000</b> |
| Random | solcap_snp_c2_9003  | chr06 | 48341966 | -                    | -                                                                    | <b>0.0000</b> | <b>0.0000</b> |
| Random | solcap_snp_c2_35055 | chr07 | 46414299 | PGSC0003DMG400009380 | Receptor protein kinase CLAVATA1                                     | <b>0.0001</b> | <b>0.0000</b> |
| Random | solcap_snp_c2_19537 | chr09 | 15802707 | PGSC0003DMG400013943 | Conserved gene of unknown function                                   | <b>0.0000</b> | <b>0.0000</b> |
| Random | solcap_snp_c2_22003 | chr09 | 45562360 | PGSC0003DMG400032243 | Homocysteine s-methyltransferase                                     | 0.1670        | <b>0.0001</b> |
| Random | solcap_snp_c2_34    | chr10 | 29455223 | -                    | -                                                                    | <b>0.0000</b> | <b>0.0000</b> |
| Random | solcap_snp_c1_4990  | chr10 | 47875686 | PGSC0003DMG400010454 | Transitional endoplasmic reticulum ATPase                            | <b>0.0000</b> | <b>0.0000</b> |
| Random | solcap_snp_c2_23942 | chr11 | 61738    | PGSC0003DMG400000994 | Calcium-dependent protein kinase 3                                   | <b>0.0000</b> | <b>0.0000</b> |
| Random | solcap_snp_c2_15342 | chr11 | 38767963 | PGSC0003DMG400008081 | Auxin response factor                                                | 0.0734        | <b>0.0000</b> |
| Random | solcap_snp_c2_15332 | chr11 | 38770184 | PGSC0003DMG400008081 | Auxin response factor                                                | <b>0.0010</b> | <b>0.0000</b> |
|        |                     |       |          |                      | Uncharacterized aarF domain-containing protein kinase, chloroplastic |               |               |
| Random | solcap_snp_c1_15926 | UM    | UM       | PGSC0003DMG400022947 |                                                                      | <b>0.0045</b> | <b>0.0007</b> |



**Table S8** Significance of model effects for the 190 tetraploid lines with phenotypic data. Three replications of the lines were evaluated in 2010 (two replications at the Wisconsin location and one replication at the New York location).

| Source of Variation | Snack Food Association<br>Chip Color | Tuber Glucose<br>Concentration | Tuber Sucrose<br>Concentration | Tuber Shape |
|---------------------|--------------------------------------|--------------------------------|--------------------------------|-------------|
| Entry               | **                                   | **                             | **                             | **          |
| Replication         | *                                    | *                              | **                             | NS          |

\* = significant at 0.01; \*\* = significant at 0.001; NS = not significant

a. Spearman rank correlations between all replicates were significant at  $p=0.05$

b. Spearman rank correlations between replicates 1 and 2 and between 1 and 3 were significant and between replicates 2 and 3 were not significant at  $p=0.05$

**Table S9** Least square means of 190 tetraploid lines with phenotypic data. Three replications of the lines were evaluated in 2010 (two replications at the Wisconsin location and one replication at the New York Location).

| <b>Clone</b>      | <b>Snack Food<br/>Association<br/>Chip Color</b> | <b>Tuber Glucose<br/>Concentration</b> | <b>Tuber Sucrose<br/>Concentration</b> | <b>Tuber<br/>Shape</b> |
|-------------------|--------------------------------------------------|----------------------------------------|----------------------------------------|------------------------|
| A96104-2          | 2.833                                            | 2.340                                  | 7.760                                  | 4.667                  |
| A97066-42         | 2.167                                            | 0.480                                  | 9.840                                  | 4.667                  |
| AC Brador         | 3.000                                            | 2.183                                  | 5.367                                  | 3.667                  |
| Adirondack Blue   | 3.167                                            | 3.870                                  | 6.387                                  | 3.667                  |
| Adirondack Red    | 2.667                                            | 1.257                                  | 5.353                                  | 4.000                  |
| AF2291-10         | 1.500                                            | 0.310                                  | 6.367                                  | 2.667                  |
| AF2376-5          | 1.833                                            | 0.533                                  | 6.650                                  | 2.667                  |
| AF2574-1          | 3.333                                            | 1.597                                  | 5.463                                  | 3.333                  |
| All Blue          | 2.500                                            | 0.817                                  | 7.233                                  | 5.000                  |
| Alpine Russet     | 3.167                                            | 1.493                                  | 9.113                                  | 4.667                  |
| Alturas           | 2.333                                            | 1.060                                  | 6.273                                  | 4.333                  |
| Andover           | 2.167                                            | 0.757                                  | 6.040                                  | 2.667                  |
| AO96141-3         | 2.667                                            | 1.113                                  | 8.090                                  | 5.000                  |
| AO96160-3         | 2.833                                            | 1.023                                  | 6.160                                  | 5.000                  |
| AO96164-1         | 2.500                                            | 0.827                                  | 6.757                                  | 5.000                  |
| AWN86514-2        | 1.833                                            | 0.683                                  | 8.703                                  | 4.333                  |
| B1829-5           | 1.833                                            | 0.220                                  | 5.297                                  | 2.667                  |
| Bannock Russet    | 2.667                                            | 0.360                                  | 6.417                                  | 4.667                  |
| Beacon Chipper    | 2.000                                            | 0.160                                  | 5.677                                  | 2.667                  |
| Bintje            | 2.667                                            | 1.260                                  | 5.890                                  | 4.000                  |
| Blazer Russet     | 3.000                                            | 1.270                                  | 7.280                                  | 5.000                  |
| Boulder           | 1.667                                            | 0.160                                  | 4.023                                  | 2.000                  |
| C31-5-115         | 3.167                                            | 2.563                                  | 8.763                                  | 2.000                  |
| C31-5-120         | 2.667                                            | 0.827                                  | 6.873                                  | 2.000                  |
| C5                | 1.667                                            | 0.473                                  | 8.123                                  | 3.333                  |
| Canela Russet     | 2.667                                            | 2.703                                  | 8.247                                  | 5.000                  |
| Cascade           | 4.000                                            | 4.020                                  | 8.090                                  | 4.333                  |
| Centennial Russet | 4.167                                            | 5.363                                  | 15.633                                 | 3.667                  |
| Chieftain         | 3.833                                            | 4.720                                  | 7.533                                  | 3.333                  |
| Chipeta           | 1.833                                            | 0.347                                  | 4.080                                  | 3.333                  |
| Chippewa          | 3.000                                            | 1.957                                  | 6.523                                  | 3.333                  |
| Classic Russet    | 3.500                                            | 3.750                                  | 7.407                                  | 5.000                  |
| Clearwater Russet | 1.500                                            | 0.183                                  | 4.870                                  | 4.667                  |
| CV96022-3         | 1.667                                            | 0.563                                  | 4.753                                  | 4.333                  |

|                    |       |       |        |       |
|--------------------|-------|-------|--------|-------|
| CV98112-3          | 2.667 | 0.860 | 7.123  | 5.000 |
| Dakota Crisp       | 1.167 | 0.197 | 5.353  | 2.667 |
| Dakota Diamond     | 1.833 | 0.170 | 6.217  | 2.667 |
| Dakota Jewel       | 3.000 | 4.280 | 9.257  | 2.667 |
| Dakota Pearl       | 1.500 | 0.570 | 4.727  | 2.667 |
| Dark Red Norland   | 4.000 | 7.187 | 12.350 | 3.333 |
| Defender           | 2.833 | 1.690 | 7.960  | 4.333 |
| Denali             | 2.167 | 0.807 | 6.137  | 2.667 |
| Early Rose         | 3.333 | 1.637 | 6.383  | 4.667 |
| Elba               | 3.667 | 3.673 | 8.540  | 2.333 |
| Eramosa            | 3.833 | 5.320 | 5.463  | 2.667 |
| Eva                | 1.833 | 1.079 | 5.512  | 2.667 |
| Exploits           | 3.167 | 1.310 | 7.577  | 2.667 |
| F02018             | 2.167 | 0.643 | 4.760  | 3.333 |
| F58050             | 1.067 | NA    | 6.657  | 1.994 |
| F66041             | 1.567 | NA    | 6.267  | 4.994 |
| F87084             | 2.500 | 2.433 | 4.263  | 2.667 |
| Freedom Russet     | 3.000 | 1.547 | 4.770  | 5.000 |
| Garnet Chile       | 3.217 | 2.139 | 10.027 | 4.003 |
| GemStar Russet     | 2.167 | 0.710 | 5.850  | 4.667 |
| Grand Falls        | 2.167 | 0.490 | 6.963  | 4.000 |
| Green Mountain     | 3.667 | 2.213 | 10.323 | 4.333 |
| Highland Russet    | 3.000 | 0.857 | 6.517  | 4.667 |
| Hindenburg         | 2.500 | 0.837 | 6.323  | 3.667 |
| Ida Rose           | 4.000 | 5.483 | 9.637  | 2.667 |
| Inca Gold          | 2.667 | 1.767 | 12.583 | 1.667 |
| Irish Cobbler      | 3.250 | 3.393 | 8.170  | 3.000 |
| Ivory Crisp        | 1.333 | 0.163 | 3.593  | 2.000 |
| Jacqueline Lee     | 2.667 | 0.973 | 9.467  | 3.667 |
| Kalkaska           | 1.667 | 0.297 | 5.600  | 1.667 |
| Katahdin           | 3.333 | 5.103 | 5.920  | 3.333 |
| Kennebec           | 2.500 | 1.150 | 4.007  | 4.000 |
| Keuka Gold         | 2.167 | 0.743 | 4.480  | 2.667 |
| King Harry (NY131) | 2.167 | 1.337 | 5.613  | 2.000 |
| Klamath Russet     | 2.667 | 0.617 | 7.823  | 4.667 |
| La Chipper         | 2.833 | 2.107 | 5.790  | 2.667 |
| Lamoka (NY139)     | 1.167 | 0.117 | 5.590  | 2.667 |
| Langlade           | 2.500 | 0.687 | 5.060  | 2.667 |
| Lehigh             | 2.667 | 0.890 | 5.007  | 2.667 |

|                      |       |        |        |       |
|----------------------|-------|--------|--------|-------|
| Lelah (W2717-5)      | 1.000 | 0.250  | 4.663  | 2.667 |
| Liberator            | 1.333 | 0.470  | 6.613  | 2.667 |
| MaineChip            | 1.167 | 0.210  | 7.330  | 2.000 |
| Marcy                | 1.167 | 0.177  | 3.313  | 3.333 |
| MegaChip (W1201)     | 1.667 | 0.193  | 4.487  | 2.667 |
| Michigan Purple      | 3.500 | 3.710  | 6.953  | 2.667 |
| Missaukee (MSJ461-1) | 1.500 | 0.263  | 5.360  | 1.667 |
| MN 02419             | 2.167 | 0.583  | 15.583 | 2.000 |
| MN 02467             | 3.000 | 1.530  | 3.843  | 5.000 |
| MN 02586             | 1.667 | 0.207  | 8.753  | 1.333 |
| MN 15620             | 2.500 | 1.213  | 9.493  | 4.333 |
| MN 18747             | 2.833 | 3.727  | 5.990  | 4.333 |
| MN 19298             | 3.833 | 4.017  | 9.097  | 2.000 |
| MN 19350             | 2.833 | 1.690  | 6.827  | 3.333 |
| MN 19470             | 1.833 | 0.917  | 6.447  | 2.667 |
| MN 96072-4           | 2.667 | 0.827  | 9.957  | 3.333 |
| MN 99380-1           | 1.833 | 0.480  | 7.403  | 2.333 |
| Modoc                | 3.167 | 1.940  | 5.510  | 2.667 |
| Monona               | 2.167 | 0.293  | 6.030  | 2.667 |
| Monticello           | 1.583 | 0.337  | 4.720  | 2.333 |
| Mountain Rose        | 2.667 | 2.237  | 6.667  | 3.333 |
| MSG227-2             | 1.333 | 0.120  | 3.727  | 3.333 |
| MSH228-6             | 1.167 | 0.237  | 6.993  | 2.333 |
| MSI005-20Y           | 2.833 | 1.620  | 8.163  | 2.333 |
| MSJ126-9Y            | 1.067 | NA     | 3.987  | 1.994 |
| MSJ147-1             | 1.000 | 0.150  | 8.507  | 3.333 |
| MSK061-4             | 1.333 | 0.517  | 5.307  | 2.667 |
| MSK409-1             | 1.000 | 0.133  | 5.267  | 2.667 |
| MSL211-3             | 4.000 | 7.073  | 8.430  | 3.333 |
| MSL268-D             | 1.500 | 0.200  | 6.050  | 2.667 |
| MSL292-A             | 1.000 | 0.127  | 5.123  | 1.000 |
| MSL512-6             | 1.333 | 0.233  | 7.400  | 3.003 |
| MSL766-1             | 2.000 | 0.340  | 8.550  | 2.000 |
| MSM051-3             | 1.333 | 0.200  | 5.253  | 2.667 |
| MSM171-A             | 4.333 | 13.907 | 7.997  | 3.333 |
| MSM182-1             | 2.667 | 2.227  | 4.913  | 2.333 |
| MSM246-B             | 1.167 | 0.110  | 5.400  | 2.000 |
| MSN105-1             | 3.167 | 1.757  | 9.173  | 2.333 |
| MSN191-2Y            | 1.000 | 0.277  | 3.977  | 2.667 |

|                        |       |       |        |       |
|------------------------|-------|-------|--------|-------|
| MSN215-2P              | 3.667 | 5.450 | 12.510 | 3.000 |
| MSP239-1               | 1.833 | 0.700 | 5.590  | 2.000 |
| MSQ070-1               | 1.167 | 0.073 | 5.260  | 2.000 |
| MSQ176-5               | 2.333 | 0.177 | 5.003  | 2.000 |
| MSQ279-1               | 1.667 | 0.290 | 4.340  | 2.000 |
| MSR061-1               | 1.333 | 0.177 | 4.117  | 2.000 |
| MSR160-2Y              | 1.333 | 0.240 | 8.127  | 2.000 |
| MWTX 2609-2RU          | 3.167 | 1.957 | 5.593  | 5.000 |
| ND1215-1 (NDSU 6)      | 2.167 | 0.460 | 5.603  | 3.333 |
| ND2858-1 (NDSU 4)      | 2.167 | 1.070 | 13.413 | 3.333 |
| ND8229-3 (NDSU 5)      | 1.500 | 0.327 | 5.427  | 5.000 |
| ND8555-8R (NDSU 3)     | 3.167 | 2.607 | 9.240  | 3.333 |
| ND860-2                | 1.500 | 0.137 | 5.563  | 2.000 |
| Nicolet (W2133-1)      | 1.167 | 0.103 | 3.257  | 1.667 |
| Norchip                | 2.333 | 0.230 | 8.073  | 2.667 |
| NorDonna               | 4.000 | 1.620 | 6.320  | 2.333 |
| Northstar              | 2.333 | 0.793 | 5.330  | 3.333 |
| NorValley              | 1.333 | 0.510 | 4.370  | 2.333 |
| Norwis (FL 657)        | 1.833 | 0.463 | 5.430  | 2.667 |
| NY115                  | 1.167 | 0.173 | 5.927  | 2.667 |
| NY121                  | 2.333 | 0.623 | 7.153  | 1.333 |
| NY136                  | 2.833 | 0.420 | 6.907  | 3.333 |
| NY140                  | 2.167 | 0.943 | 5.750  | 3.333 |
| NY142                  | 4.167 | 5.093 | 11.823 | 2.333 |
| NYE48-2                | 1.000 | 0.167 | 3.697  | 3.333 |
| Ontario                | 3.333 | 3.160 | 7.023  | 2.667 |
| OR00068-11             | 2.500 | 1.013 | 9.103  | 2.667 |
| PA99N82-4              | 2.967 | 1.134 | 6.492  | 3.503 |
| Patagonia (NDSU 2)     | 3.667 | 2.203 | 7.567  | 4.333 |
| Peter Wilcox           | 2.000 | 0.720 | 5.787  | 3.333 |
| Pike                   | 1.167 | 0.100 | 3.633  | 2.333 |
| POR01PG1-6             | NA    | 0.613 | 6.297  | 4.994 |
| POR01PG16-1            | 1.833 | 1.173 | 7.507  | 5.000 |
| POR01PG22-1            | 2.500 | 0.794 | 4.637  | 5.000 |
| POR02PG37-2            | 2.667 | 1.170 | 7.903  | 2.667 |
| Premier Russet         | 1.833 | 0.167 | 8.263  | 4.333 |
| Prince Hairy (NY235-4) | 2.667 | 1.757 | 6.700  | 2.000 |
| Purple Majesty         | 1.667 | 0.287 | 6.290  | 3.333 |
| Purple Peruvian        | 1.667 | 2.313 | 9.317  | 5.000 |

|                                     |       |       |        |       |
|-------------------------------------|-------|-------|--------|-------|
| Ranger Russet                       | 3.000 | 0.577 | 8.363  | 5.000 |
| Reba                                | 1.333 | 0.317 | 4.823  | 3.333 |
| Red Maria (NY129)                   | 3.167 | 1.780 | 7.243  | 2.333 |
| Reeves Kingpin                      | 3.167 | 3.233 | 6.520  | 5.000 |
| Rideau                              | 3.167 | 1.263 | 8.643  | 2.667 |
| Rochdale Gold- Doree                | 3.000 | 1.460 | 7.487  | 2.000 |
| Rosa                                | 2.167 | 0.430 | 6.807  | 2.667 |
| Russet Burbank                      | 2.667 | 0.980 | 6.937  | 4.667 |
| Russet Norkotah-S3                  | 3.167 | 2.233 | 8.163  | 4.333 |
| Russet Norkotah-S8                  | 3.500 | 2.160 | 6.167  | 4.333 |
| Salem                               | 3.167 | 2.653 | 9.317  | 3.333 |
| Satina                              | 3.500 | 3.177 | 6.960  | 2.667 |
| Sebago                              | 3.000 | 4.703 | 6.027  | 2.667 |
| Sierra Gold                         | 2.667 | 0.517 | 6.420  | 3.333 |
| Silverton Russet                    | 2.500 | 0.797 | 5.013  | 5.000 |
| Snowden                             | 1.167 | 0.127 | 4.277  | 2.000 |
| Superior                            | 2.833 | 2.387 | 6.607  | 2.667 |
| TrailBlazer Russet (ROND95249-Russ) | 1.833 | 0.340 | 5.147  | 4.333 |
| Tundra (W2310-3)                    | 1.000 | 0.120 | 4.357  | 2.333 |
| Umatilla Russet                     | 2.500 | 2.497 | 6.087  | 5.000 |
| V1102-1                             | 3.667 | 2.373 | 10.907 | 4.333 |
| V1115-3                             | 2.667 | 1.117 | 5.257  | 4.333 |
| Villetta Rose                       | 3.167 | 1.300 | 5.230  | 2.667 |
| W1151rus                            | 3.333 | 4.800 | 7.500  | 5.000 |
| W2253-5rus                          | 3.500 | 2.907 | 8.383  | 4.333 |
| W2309-7                             | 1.000 | 0.153 | 4.087  | 3.333 |
| W2683-2rus                          | 2.333 | 0.653 | 7.763  | 5.000 |
| W4013-1                             | 1.167 | 0.137 | 4.877  | 2.333 |
| Wallowa Russet                      | 2.667 | 0.523 | 6.663  | 5.000 |
| Waneta (NY138)                      | 1.167 | 0.140 | 3.870  | 3.333 |
| Western russet                      | 3.000 | 1.030 | 6.427  | 4.333 |
| White Pearl                         | 1.000 | 0.101 | 3.158  | 2.500 |
| Willamette                          | 1.067 | NA    | 4.107  | NA    |
| Winema                              | 3.167 | 2.307 | 6.123  | 3.333 |
| Yankee Chipper                      | 2.000 | 0.287 | 5.457  | 3.667 |
| Yukon Gem                           | 1.833 | 0.603 | 5.227  | 3.333 |
| Yukon Gold                          | 3.333 | 1.210 | 7.190  | 3.000 |
| Rio Grande Russet                   | 3.000 | 1.373 | 7.333  | 5.000 |
| Atlantic                            | 1.333 | 0.143 | 4.660  | 2.000 |

**Table S10** Summary of single nucleotide polymorphisms (SNPs) in carotenoid biosynthetic pathway genes tested for significant differences in allele or genotype composition compared to that observed in all other cultivated potato lines. SNPs with a p-value $\leq$ 0.05 were considered significant.

| <b>PGSC Gene</b>     | <b>Annotation</b>                                            | <b>Significant Allele Frequency<br/>(Significant SNPs / Total SNPs)</b> | <b>Significant Genotype Frequency<br/>(Significant SNPs / Total SNPs)</b> |
|----------------------|--------------------------------------------------------------|-------------------------------------------------------------------------|---------------------------------------------------------------------------|
| PGSC0003DMG400013335 | pTOX - alternative oxidase<br>CHY1 - beta-carotene           | 0/1                                                                     | 0/1                                                                       |
| PGSC0003DMG400028897 | hydroxylase                                                  | 1/1                                                                     | 1/1                                                                       |
| PGSC0003DMG400008159 | LCY-b - lycopene beta cyclase,<br>chloroplastic              | 0/3                                                                     | 0/3                                                                       |
| PGSC0003DMG400010637 | LCY-b - lycopene beta cyclase,<br>chloroplastic              | 0/2                                                                     | 1/2                                                                       |
| PGSC0003DMG400009156 | PDS - phytoene dehydrogenase,<br>chloroplastic/chromoplastic | 0/2                                                                     | 1/2                                                                       |
| PGSC0003DMG400028224 | CrtISO - carotenoid isomerase,<br>chloroplastic              | 0/2                                                                     | 0/2                                                                       |
| PGSC0003DMG400022473 | ZDS - zeta-carotene desaturase                               | 2/4                                                                     | 1/4                                                                       |
| PGSC0003DMG400000333 | LCY-e - lycopene epsilon cyclase                             | 0/3                                                                     | 1/3                                                                       |
