# Supplementary material for: Retrospective View of North American Potato (Solanum tuberosum L.) Breeding in the 20th and 21st Centuries
Source: PubMed Central journal article supplement (PMC3689798; doi:10.1534/g3.113.005595), 2013-06-01
Supplement: supp_g3.113.005595_FigureS1.pdf [file supp_g3.113.005595_FigureS1.pdf]

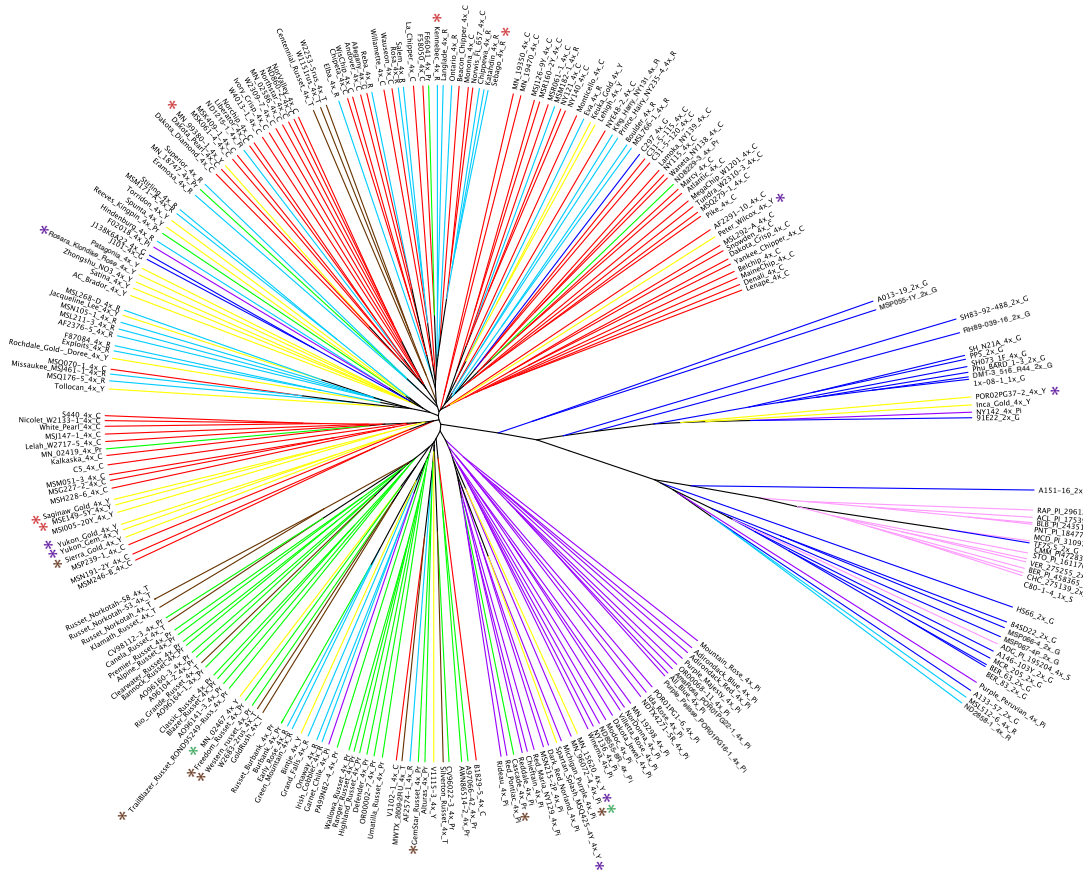

**Figure S1** Unweighted pair group method with arithmetic mean (UPGMA) tree of 250 potato lines based on 3,763 single nucleotide polymorphism markers with dosage genotype calls and individual lines labeled. Color-coding is based on predominant market class designation and asterisks indicate lines that can be classified into more than one market class (red – Chip Processing; dark blue – Genetic Stock; purple – Pigmented; green - French Fry Processing; light blue – Round White Table; pink – Wild Species; brown – Table Russet; yellow – Yellow).
