# Supplementary material for: Retrospective View of North American Potato (Solanum tuberosum L.) Breeding in the 20th and 21st Centuries
Source: PubMed Central journal article supplement (PMC3689798; doi:10.1534/g3.113.005595), 2013-06-01
Supplement: supp_g3.113.005595_FigureS4.pdf [file supp_g3.113.005595_FigureS4.pdf]

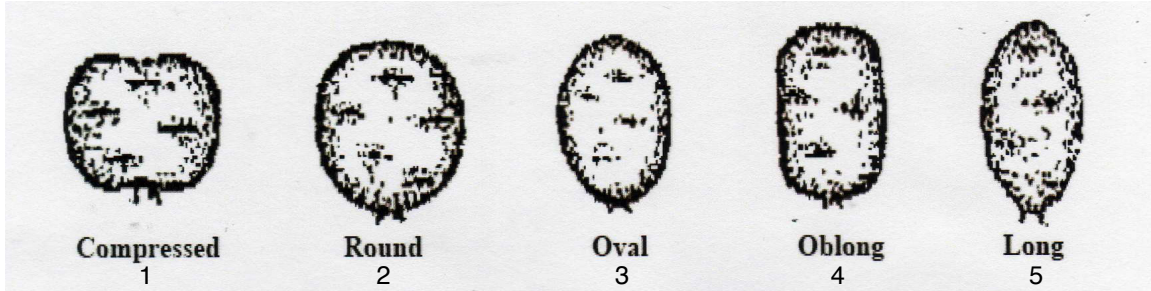

Figure S4 Tuber shape measurement standard.
