# Supplementary material for: Retrospective View of North American Potato (Solanum tuberosum L.) Breeding in the 20th and 21st Centuries
Source: PubMed Central journal article supplement (PMC3689798; doi:10.1534/g3.113.005595), 2013-06-01
Supplement: supp_g3.113.005595_FigureS6.pdf [file supp_g3.113.005595_FigureS6.pdf]

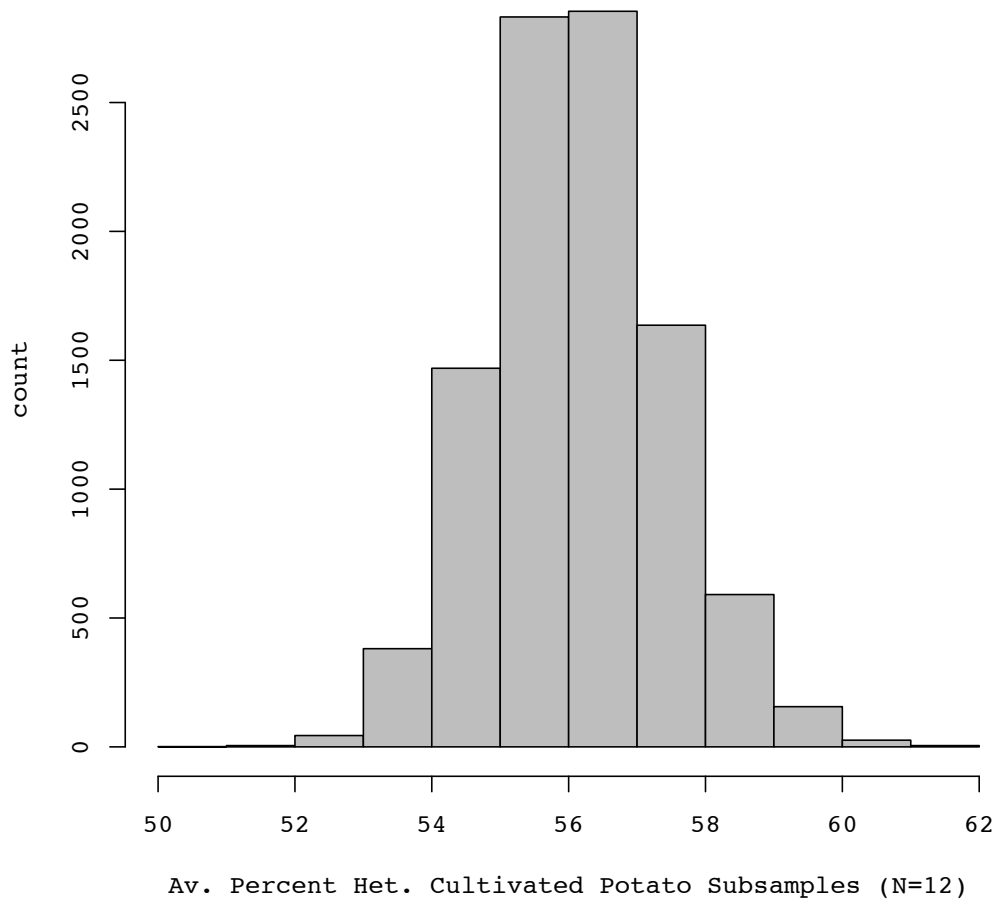

**Figure S6** Histogram of average percent heterozygosity in subsamples (N=12) of the cultivated potato clones. Sub-sampling was performed with replacement 10,000 times.
