# Supplementary material for: Retrospective View of North American Potato (Solanum tuberosum L.) Breeding in the 20th and 21st Centuries
Source: PubMed Central journal article supplement (PMC3689798; doi:10.1534/g3.113.005595), 2013-06-01
Supplement: supp_g3.113.005595_TableS5.pdf [file supp_g3.113.005595_TableS5.pdf]

**Table S5** Single nucleotide polymorphisms (SNPs) in carotenoid biosynthetic pathway genes and random SNPs tested for significant differences in allele or genotype composition compared to that observed in all other cultivated potato lines. Bold numbers indicate significance at p-value $\leq$ 0.05.

| SNP Type   | SNP Name            | PGSC Gene            | Annotation                                                           | Allele Frequency p-value | Genotype Frequency p-value |
|------------|---------------------|----------------------|----------------------------------------------------------------------|--------------------------|----------------------------|
| Carotenoid | solcap_snp_c2_13431 | PGSC0003DMG400013335 | alternative oxidase                                                  | 0.503                    | 0.622                      |
| Carotenoid | solcap_snp_c1_12691 | PGSC0003DMG400028897 | beta-carotene hydroxylase                                            | <b>0.006</b>             | <b>0.005</b>               |
| Carotenoid | solcap_snp_c2_45240 | PGSC0003DMG400008159 | lycopene beta cyclase, chloroplastic                                 | 0.976                    | 0.886                      |
| Carotenoid | solcap_snp_c2_45242 | PGSC0003DMG400008159 | lycopene beta cyclase, chloroplastic                                 | 0.917                    | 0.648                      |
| Carotenoid | solcap_snp_c2_45244 | PGSC0003DMG400008159 | lycopene beta cyclase, chloroplastic                                 | 0.875                    | 0.668                      |
| Carotenoid | solcap_snp_c2_51559 | PGSC0003DMG400010637 | lycopene beta cyclase, chloroplastic                                 | 0.802                    | 0.222                      |
| Carotenoid | solcap_snp_c2_51560 | PGSC0003DMG400010637 | lycopene beta cyclase, chloroplastic                                 | 0.220                    | <b>0.045</b>               |
| Carotenoid | solcap_snp_c2_37118 | PGSC0003DMG400009156 | phytoene dehydrogenase, chloroplastic/chromoplastic                  | 0.345                    | 0.195                      |
| Carotenoid | solcap_snp_c2_37121 | PGSC0003DMG400009156 | phytoene dehydrogenase, chloroplastic/chromoplastic                  | 0.070                    | <b>0.035</b>               |
| Carotenoid | solcap_snp_c1_9060  | PGSC0003DMG400028224 | carotenoid isomerase, chloroplastic                                  | 0.131                    | 0.417                      |
| Carotenoid | solcap_snp_c2_29741 | PGSC0003DMG400028224 | carotenoid isomerase, chloroplastic                                  | 0.589                    | 0.051                      |
| Carotenoid | solcap_snp_c1_5286  | PGSC0003DMG400022473 | zeta-carotene desaturase                                             | <b>0.010</b>             | 0.239                      |
| Carotenoid | solcap_snp_c2_16424 | PGSC0003DMG400022473 | zeta-carotene desaturase                                             | 0.236                    | 0.070                      |
| Carotenoid | solcap_snp_c2_16425 | PGSC0003DMG400022473 | zeta-carotene desaturase                                             | 0.217                    | <b>0.011</b>               |
| Carotenoid | solcap_snp_c2_16426 | PGSC0003DMG400022473 | zeta-carotene desaturase                                             | <b>0.019</b>             | 0.300                      |
| Carotenoid | solcap_snp_c2_27926 | PGSC0003DMG400000333 | lycopene epsilon cyclase                                             | 0.687                    | 0.723                      |
| Carotenoid | solcap_snp_c2_27929 | PGSC0003DMG400000333 | lycopene epsilon cyclase                                             | 0.438                    | <b>0.031</b>               |
| Carotenoid | solcap_snp_c2_27930 | PGSC0003DMG400000333 | lycopene epsilon cyclase                                             | 0.512                    | 0.363                      |
| Random     | solcap_snp_c1_13189 | PGSC0003DMG400022953 | pyruvate decarboxylase                                               | 0.370                    | 0.360                      |
| Random     | solcap_snp_c1_4990  | PGSC0003DMG400010454 | transitional endoplasmic reticulum ATPase                            | 0.356                    | 0.123                      |
| Random     | solcap_snp_c2_11479 | PGSC0003DMG400027738 | GTP-binding protein                                                  | 0.829                    | 0.384                      |
| Random     | solcap_snp_c2_11758 | PGSC0003DMG400000810 | serine-threonine protein kinase, plant-type                          | 0.604                    | 0.524                      |
| Random     | solcap_snp_c2_15332 | PGSC0003DMG400008081 | auxin response factor                                                | 0.171                    | 0.326                      |
| Random     | solcap_snp_c2_15342 | PGSC0003DMG400008081 | auxin response factor                                                | 0.122                    | 0.313                      |
| Random     | solcap_snp_c2_19537 | PGSC0003DMG400013943 | conserved gene of unknown function                                   | 0.194                    | <b>0.032</b>               |
| Random     | solcap_snp_c2_22003 | PGSC0003DMG400032243 | homocysteine s-methyltransferase                                     | <b>0.017</b>             | 0.065                      |
| Random     | solcap_snp_c2_23942 | PGSC0003DMG400000994 | calcium-dependent protein kinase 3                                   | 0.925                    | 0.222                      |
| Random     | solcap_snp_c2_34    | -                    | -                                                                    | 0.527                    | 0.740                      |
| Random     | solcap_snp_c2_35055 | PGSC0003DMG400009380 | receptor protein kinase CLAVATA1                                     | <b>0.017</b>             | <b>0.020</b>               |
| Random     | solcap_snp_c2_36264 | PGSC0003DMG400013391 | conserved gene of unknown function                                   | 0.721                    | 0.792                      |
| Random     | solcap_snp_c2_46455 | PGSC0003DMG400025176 | non-symbiotic hemoglobin                                             | 0.908                    | 0.474                      |
| Random     | solcap_snp_c2_55863 | PGSC0003DMG400023897 | self-pruning G-box protein                                           | 0.079                    | 0.562                      |
| Random     | solcap_snp_c2_9003  | -                    | -                                                                    | 0.267                    | 0.847                      |
| Random     | solcap_snp_c1_15926 | PGSC0003DMG400022947 | uncharacterized aarF domain-containing protein kinase, chloroplastic | <b>0.003</b>             | 0.062                      |
| Random     | solcap_snp_c2_20569 | PGSC0003DMG400028985 | calcium ion binding protein                                          | 0.849                    | 0.262                      |
| Random     | solcap_snp_c2_49451 | PGSC0003DMG400001685 | acyl carrier protein                                                 | 0.252                    | 0.296                      |
