# Supplementary material for: Retrospective View of North American Potato (Solanum tuberosum L.) Breeding in the 20th and 21st Centuries
Source: PubMed Central journal article supplement (PMC3689798; doi:10.1534/g3.113.005595), 2013-06-01
Supplement: supp_g3.113.005595_TableS7.pdf [file supp_g3.113.005595_TableS7.pdf]

**Table S7** Single nucleotide polymorphisms (SNPs) in glycoalkaloid biosynthetic pathway candidate genes and random SNPs throughout the genome tested for significant differences in allele or genotype composition between the Wild Species and cultivated potato lines. Analysis was done using the diploid genotyping model. Bold numbers indicate significance at  $p\text{-value} \leq 0.05$ .

| SNP Type      | SNP                 | Chr   | Position | PGSC Gene            | Annotation                                             | Allele Frequency p-value | Genotype Frequency p-value |
|---------------|---------------------|-------|----------|----------------------|--------------------------------------------------------|--------------------------|----------------------------|
| Glycoalkaloid | solcap_snp_c1_15972 | chr02 | 15346371 | PGSC0003DMG400003461 | 3-hydroxy-3-methylglutaryl coenzyme A reductase (HMG2) | <b>0.0005</b>            | <b>0.0000</b>              |
| Glycoalkaloid | solcap_snp_c1_15975 | chr02 | 15348125 | PGSC0003DMG400003461 | 3-hydroxy-3-methylglutaryl coenzyme A reductase (HMG2) | <b>0.0043</b>            | <b>0.0004</b>              |
| Glycoalkaloid | solcap_snp_c1_9696  | chr02 | 21888552 | PGSC0003DMG400003324 | squalene epoxidase (SQE)                               | <b>0.0000</b>            | <b>0.0000</b>              |
| Glycoalkaloid | solcap_snp_c2_32413 | chr02 | 21888699 | PGSC0003DMG400003324 | squalene epoxidase (SQE)                               | <b>0.0007</b>            | <b>0.0000</b>              |
| Glycoalkaloid | solcap_snp_c2_32414 | chr02 | 21889615 | PGSC0003DMG400003324 | squalene epoxidase (SQE)                               | 0.1855                   | 0.1691                     |
| Glycoalkaloid | solcap_snp_c2_32417 | chr02 | 21892360 | PGSC0003DMG400003324 | squalene epoxidase (SQE)                               | <b>0.0000</b>            | <b>0.0000</b>              |
| Glycoalkaloid | solcap_snp_c2_23391 | chr07 | 39727554 | PGSC0003DMG400011749 | UDP-galactose:solanidine galactosyltransferase (SGT1)  | <b>0.0057</b>            | <b>0.0008</b>              |
| Glycoalkaloid | solcap_snp_c2_23390 | chr07 | 39727884 | PGSC0003DMG400011749 | UDP-galactose:solanidine galactosyltransferase (SGT1)  | 0.1921                   | 0.0894                     |
| Glycoalkaloid | solcap_snp_c2_23389 | chr07 | 39727960 | PGSC0003DMG400011749 | UDP-galactose:solanidine galactosyltransferase (SGT1)  | <b>0.0004</b>            | 0.0788                     |
| Glycoalkaloid | solcap_snp_c2_23388 | chr07 | 39728034 | PGSC0003DMG400011749 | UDP-galactose:solanidine galactosyltransferase (SGT1)  | 0.2698                   | <b>0.0258</b>              |
| Glycoalkaloid | solcap_snp_c2_23385 | chr07 | 39728475 | PGSC0003DMG400011749 | UDP-galactose:solanidine galactosyltransferase (SGT1)  | <b>0.0000</b>            | <b>0.0000</b>              |
| Glycoalkaloid | solcap_snp_c2_23384 | chr07 | 39728673 | PGSC0003DMG400011749 | UDP-galactose:solanidine galactosyltransferase (SGT1)  | 0.3493                   | 0.3404                     |
| Glycoalkaloid | solcap_snp_c2_23383 | chr07 | 39728724 | PGSC0003DMG400011749 | UDP-galactose:solanidine galactosyltransferase (SGT1)  | 0.8660                   | <b>0.0007</b>              |
| Glycoalkaloid | solcap_snp_c2_23382 | chr07 | 39728727 | PGSC0003DMG400011749 | UDP-galactose:solanidine galactosyltransferase (SGT1)  | 0.9184                   | <b>0.0008</b>              |
| Glycoalkaloid | solcap_snp_c2_23381 | chr07 | 39728817 | PGSC0003DMG400011749 | UDP-galactose:solanidine galactosyltransferase (SGT1)  | <b>0.0068</b>            | <b>0.0000</b>              |
| Glycoalkaloid | solcap_snp_c2_49600 | chr08 | 35218101 | PGSC0003DMG400017508 | UDP-glucose:solanidine glucosyltransferase (SGT2)      | <b>0.0010</b>            | <b>0.0000</b>              |
| Glycoalkaloid | solcap_snp_c2_49601 | chr08 | 35218300 | PGSC0003DMG400017508 | UDP-glucose:solanidine glucosyltransferase (SGT2)      | <b>0.0003</b>            | <b>0.0000</b>              |
| Glycoalkaloid | solcap_snp_c2_49602 | chr08 | 35218570 | PGSC0003DMG400017508 | UDP-glucose:solanidine glucosyltransferase (SGT2)      | <b>0.0001</b>            | <b>0.0000</b>              |
| Glycoalkaloid | solcap_snp_c2_49604 | chr08 | 35219038 | PGSC0003DMG400017508 | UDP-glucose:solanidine glucosyltransferase (SGT2)      | 0.0732                   | <b>0.0420</b>              |
| Random        | solcap_snp_c2_20569 | chr01 | 60048382 | PGSC0003DMG400028985 | Calcium ion binding protein                            | <b>0.0005</b>            | <b>0.0000</b>              |
| Random        | solcap_snp_c2_49451 | chr01 | 61451309 | PGSC0003DMG400001685 | Acyl carrier protein                                   | <b>0.0011</b>            | <b>0.0000</b>              |
| Random        | solcap_snp_c2_46455 | chr01 | 78455375 | PGSC0003DMG400025176 | Non-symbiotic                                          | <b>0.0142</b>            | <b>0.0040</b>              |

|        |                     |       |          |                      |                                                                      |               |               |
|--------|---------------------|-------|----------|----------------------|----------------------------------------------------------------------|---------------|---------------|
|        |                     |       |          |                      | hemoglobin                                                           |               |               |
| Random | solcap_snp_c2_55863 | chr02 | 19615327 | PGSC0003DMG400023897 | Self-pruning G-box protein                                           | <b>0.0000</b> | <b>0.0000</b> |
| Random | solcap_snp_c2_36264 | chr03 | 582345   | PGSC0003DMG400013391 | Conserved gene of unknown function                                   | <b>0.0016</b> | <b>0.0000</b> |
| Random | solcap_snp_c2_11479 | chr04 | 5352996  | PGSC0003DMG400027738 | GTP-binding protein                                                  | 0.3522        | <b>0.0000</b> |
| Random | solcap_snp_c2_11758 | chr05 | 1997209  | PGSC0003DMG400000810 | Serine-threonine protein kinase, plant-type                          | <b>0.0019</b> | <b>0.0000</b> |
| Random | solcap_snp_c2_9003  | chr06 | 48341966 | -                    | -                                                                    | <b>0.0000</b> | <b>0.0000</b> |
| Random | solcap_snp_c2_35055 | chr07 | 46414299 | PGSC0003DMG400009380 | Receptor protein kinase CLAVATA1                                     | <b>0.0001</b> | <b>0.0000</b> |
| Random | solcap_snp_c2_19537 | chr09 | 15802707 | PGSC0003DMG400013943 | Conserved gene of unknown function                                   | <b>0.0000</b> | <b>0.0000</b> |
| Random | solcap_snp_c2_22003 | chr09 | 45562360 | PGSC0003DMG400032243 | Homocysteine s-methyltransferase                                     | 0.1670        | <b>0.0001</b> |
| Random | solcap_snp_c2_34    | chr10 | 29455223 | -                    | -                                                                    | <b>0.0000</b> | <b>0.0000</b> |
| Random | solcap_snp_c1_4990  | chr10 | 47875686 | PGSC0003DMG400010454 | Transitional endoplasmic reticulum ATPase                            | <b>0.0000</b> | <b>0.0000</b> |
| Random | solcap_snp_c2_23942 | chr11 | 61738    | PGSC0003DMG400000994 | Calcium-dependent protein kinase 3                                   | <b>0.0000</b> | <b>0.0000</b> |
| Random | solcap_snp_c2_15342 | chr11 | 38767963 | PGSC0003DMG400008081 | Auxin response factor                                                | 0.0734        | <b>0.0000</b> |
| Random | solcap_snp_c2_15332 | chr11 | 38770184 | PGSC0003DMG400008081 | Auxin response factor                                                | <b>0.0010</b> | <b>0.0000</b> |
|        |                     |       |          |                      | Uncharacterized aarF domain-containing protein kinase, chloroplastic |               |               |
| Random | solcap_snp_c1_15926 | UM    | UM       | PGSC0003DMG400022947 |                                                                      | <b>0.0045</b> | <b>0.0007</b> |
