# Supplementary material for: Retrospective View of North American Potato (Solanum tuberosum L.) Breeding in the 20th and 21st Centuries
Source: PubMed Central journal article supplement (PMC3689798; doi:10.1534/g3.113.005595), 2013-06-01
Supplement: supp_g3.113.005595_TableS9.pdf [file supp_g3.113.005595_TableS9.pdf]

**Table S9** Least square means of 190 tetraploid lines with phenotypic data. Three replications of the lines were evaluated in 2010 (two replications at the Wisconsin location and one replication at the New York Location).

| <b>Clone</b>      | <b>Snack Food<br/>Association<br/>Chip Color</b> | <b>Tuber Glucose<br/>Concentration</b> | <b>Tuber Sucrose<br/>Concentration</b> | <b>Tuber<br/>Shape</b> |
|-------------------|--------------------------------------------------|----------------------------------------|----------------------------------------|------------------------|
| A96104-2          | 2.833                                            | 2.340                                  | 7.760                                  | 4.667                  |
| A97066-42         | 2.167                                            | 0.480                                  | 9.840                                  | 4.667                  |
| AC Brador         | 3.000                                            | 2.183                                  | 5.367                                  | 3.667                  |
| Adirondack Blue   | 3.167                                            | 3.870                                  | 6.387                                  | 3.667                  |
| Adirondack Red    | 2.667                                            | 1.257                                  | 5.353                                  | 4.000                  |
| AF2291-10         | 1.500                                            | 0.310                                  | 6.367                                  | 2.667                  |
| AF2376-5          | 1.833                                            | 0.533                                  | 6.650                                  | 2.667                  |
| AF2574-1          | 3.333                                            | 1.597                                  | 5.463                                  | 3.333                  |
| All Blue          | 2.500                                            | 0.817                                  | 7.233                                  | 5.000                  |
| Alpine Russet     | 3.167                                            | 1.493                                  | 9.113                                  | 4.667                  |
| Alturas           | 2.333                                            | 1.060                                  | 6.273                                  | 4.333                  |
| Andover           | 2.167                                            | 0.757                                  | 6.040                                  | 2.667                  |
| AO96141-3         | 2.667                                            | 1.113                                  | 8.090                                  | 5.000                  |
| AO96160-3         | 2.833                                            | 1.023                                  | 6.160                                  | 5.000                  |
| AO96164-1         | 2.500                                            | 0.827                                  | 6.757                                  | 5.000                  |
| AWN86514-2        | 1.833                                            | 0.683                                  | 8.703                                  | 4.333                  |
| B1829-5           | 1.833                                            | 0.220                                  | 5.297                                  | 2.667                  |
| Bannock Russet    | 2.667                                            | 0.360                                  | 6.417                                  | 4.667                  |
| Beacon Chipper    | 2.000                                            | 0.160                                  | 5.677                                  | 2.667                  |
| Bintje            | 2.667                                            | 1.260                                  | 5.890                                  | 4.000                  |
| Blazer Russet     | 3.000                                            | 1.270                                  | 7.280                                  | 5.000                  |
| Boulder           | 1.667                                            | 0.160                                  | 4.023                                  | 2.000                  |
| C31-5-115         | 3.167                                            | 2.563                                  | 8.763                                  | 2.000                  |
| C31-5-120         | 2.667                                            | 0.827                                  | 6.873                                  | 2.000                  |
| C5                | 1.667                                            | 0.473                                  | 8.123                                  | 3.333                  |
| Canela Russet     | 2.667                                            | 2.703                                  | 8.247                                  | 5.000                  |
| Cascade           | 4.000                                            | 4.020                                  | 8.090                                  | 4.333                  |
| Centennial Russet | 4.167                                            | 5.363                                  | 15.633                                 | 3.667                  |
| Chieftain         | 3.833                                            | 4.720                                  | 7.533                                  | 3.333                  |
| Chipeta           | 1.833                                            | 0.347                                  | 4.080                                  | 3.333                  |
| Chippewa          | 3.000                                            | 1.957                                  | 6.523                                  | 3.333                  |
| Classic Russet    | 3.500                                            | 3.750                                  | 7.407                                  | 5.000                  |
| Clearwater Russet | 1.500                                            | 0.183                                  | 4.870                                  | 4.667                  |
| CV96022-3         | 1.667                                            | 0.563                                  | 4.753                                  | 4.333                  |

|                    |       |       |        |       |
|--------------------|-------|-------|--------|-------|
| CV98112-3          | 2.667 | 0.860 | 7.123  | 5.000 |
| Dakota Crisp       | 1.167 | 0.197 | 5.353  | 2.667 |
| Dakota Diamond     | 1.833 | 0.170 | 6.217  | 2.667 |
| Dakota Jewel       | 3.000 | 4.280 | 9.257  | 2.667 |
| Dakota Pearl       | 1.500 | 0.570 | 4.727  | 2.667 |
| Dark Red Norland   | 4.000 | 7.187 | 12.350 | 3.333 |
| Defender           | 2.833 | 1.690 | 7.960  | 4.333 |
| Denali             | 2.167 | 0.807 | 6.137  | 2.667 |
| Early Rose         | 3.333 | 1.637 | 6.383  | 4.667 |
| Elba               | 3.667 | 3.673 | 8.540  | 2.333 |
| Eramosa            | 3.833 | 5.320 | 5.463  | 2.667 |
| Eva                | 1.833 | 1.079 | 5.512  | 2.667 |
| Exploits           | 3.167 | 1.310 | 7.577  | 2.667 |
| F02018             | 2.167 | 0.643 | 4.760  | 3.333 |
| F58050             | 1.067 | NA    | 6.657  | 1.994 |
| F66041             | 1.567 | NA    | 6.267  | 4.994 |
| F87084             | 2.500 | 2.433 | 4.263  | 2.667 |
| Freedom Russet     | 3.000 | 1.547 | 4.770  | 5.000 |
| Garnet Chile       | 3.217 | 2.139 | 10.027 | 4.003 |
| GemStar Russet     | 2.167 | 0.710 | 5.850  | 4.667 |
| Grand Falls        | 2.167 | 0.490 | 6.963  | 4.000 |
| Green Mountain     | 3.667 | 2.213 | 10.323 | 4.333 |
| Highland Russet    | 3.000 | 0.857 | 6.517  | 4.667 |
| Hindenburg         | 2.500 | 0.837 | 6.323  | 3.667 |
| Ida Rose           | 4.000 | 5.483 | 9.637  | 2.667 |
| Inca Gold          | 2.667 | 1.767 | 12.583 | 1.667 |
| Irish Cobbler      | 3.250 | 3.393 | 8.170  | 3.000 |
| Ivory Crisp        | 1.333 | 0.163 | 3.593  | 2.000 |
| Jacqueline Lee     | 2.667 | 0.973 | 9.467  | 3.667 |
| Kalkaska           | 1.667 | 0.297 | 5.600  | 1.667 |
| Katahdin           | 3.333 | 5.103 | 5.920  | 3.333 |
| Kennebec           | 2.500 | 1.150 | 4.007  | 4.000 |
| Keuka Gold         | 2.167 | 0.743 | 4.480  | 2.667 |
| King Harry (NY131) | 2.167 | 1.337 | 5.613  | 2.000 |
| Klamath Russet     | 2.667 | 0.617 | 7.823  | 4.667 |
| La Chipper         | 2.833 | 2.107 | 5.790  | 2.667 |
| Lamoka (NY139)     | 1.167 | 0.117 | 5.590  | 2.667 |
| Langlade           | 2.500 | 0.687 | 5.060  | 2.667 |
| Lehigh             | 2.667 | 0.890 | 5.007  | 2.667 |

|                      |       |        |        |       |
|----------------------|-------|--------|--------|-------|
| Lelah (W2717-5)      | 1.000 | 0.250  | 4.663  | 2.667 |
| Liberator            | 1.333 | 0.470  | 6.613  | 2.667 |
| MaineChip            | 1.167 | 0.210  | 7.330  | 2.000 |
| Marcy                | 1.167 | 0.177  | 3.313  | 3.333 |
| MegaChip (W1201)     | 1.667 | 0.193  | 4.487  | 2.667 |
| Michigan Purple      | 3.500 | 3.710  | 6.953  | 2.667 |
| Missaukee (MSJ461-1) | 1.500 | 0.263  | 5.360  | 1.667 |
| MN 02419             | 2.167 | 0.583  | 15.583 | 2.000 |
| MN 02467             | 3.000 | 1.530  | 3.843  | 5.000 |
| MN 02586             | 1.667 | 0.207  | 8.753  | 1.333 |
| MN 15620             | 2.500 | 1.213  | 9.493  | 4.333 |
| MN 18747             | 2.833 | 3.727  | 5.990  | 4.333 |
| MN 19298             | 3.833 | 4.017  | 9.097  | 2.000 |
| MN 19350             | 2.833 | 1.690  | 6.827  | 3.333 |
| MN 19470             | 1.833 | 0.917  | 6.447  | 2.667 |
| MN 96072-4           | 2.667 | 0.827  | 9.957  | 3.333 |
| MN 99380-1           | 1.833 | 0.480  | 7.403  | 2.333 |
| Modoc                | 3.167 | 1.940  | 5.510  | 2.667 |
| Monona               | 2.167 | 0.293  | 6.030  | 2.667 |
| Monticello           | 1.583 | 0.337  | 4.720  | 2.333 |
| Mountain Rose        | 2.667 | 2.237  | 6.667  | 3.333 |
| MSG227-2             | 1.333 | 0.120  | 3.727  | 3.333 |
| MSH228-6             | 1.167 | 0.237  | 6.993  | 2.333 |
| MSI005-20Y           | 2.833 | 1.620  | 8.163  | 2.333 |
| MSJ126-9Y            | 1.067 | NA     | 3.987  | 1.994 |
| MSJ147-1             | 1.000 | 0.150  | 8.507  | 3.333 |
| MSK061-4             | 1.333 | 0.517  | 5.307  | 2.667 |
| MSK409-1             | 1.000 | 0.133  | 5.267  | 2.667 |
| MSL211-3             | 4.000 | 7.073  | 8.430  | 3.333 |
| MSL268-D             | 1.500 | 0.200  | 6.050  | 2.667 |
| MSL292-A             | 1.000 | 0.127  | 5.123  | 1.000 |
| MSL512-6             | 1.333 | 0.233  | 7.400  | 3.003 |
| MSL766-1             | 2.000 | 0.340  | 8.550  | 2.000 |
| MSM051-3             | 1.333 | 0.200  | 5.253  | 2.667 |
| MSM171-A             | 4.333 | 13.907 | 7.997  | 3.333 |
| MSM182-1             | 2.667 | 2.227  | 4.913  | 2.333 |
| MSM246-B             | 1.167 | 0.110  | 5.400  | 2.000 |
| MSN105-1             | 3.167 | 1.757  | 9.173  | 2.333 |
| MSN191-2Y            | 1.000 | 0.277  | 3.977  | 2.667 |

|                        |       |       |        |       |
|------------------------|-------|-------|--------|-------|
| MSN215-2P              | 3.667 | 5.450 | 12.510 | 3.000 |
| MSP239-1               | 1.833 | 0.700 | 5.590  | 2.000 |
| MSQ070-1               | 1.167 | 0.073 | 5.260  | 2.000 |
| MSQ176-5               | 2.333 | 0.177 | 5.003  | 2.000 |
| MSQ279-1               | 1.667 | 0.290 | 4.340  | 2.000 |
| MSR061-1               | 1.333 | 0.177 | 4.117  | 2.000 |
| MSR160-2Y              | 1.333 | 0.240 | 8.127  | 2.000 |
| MWTX 2609-2RU          | 3.167 | 1.957 | 5.593  | 5.000 |
| ND1215-1 (NDSU 6)      | 2.167 | 0.460 | 5.603  | 3.333 |
| ND2858-1 (NDSU 4)      | 2.167 | 1.070 | 13.413 | 3.333 |
| ND8229-3 (NDSU 5)      | 1.500 | 0.327 | 5.427  | 5.000 |
| ND8555-8R (NDSU 3)     | 3.167 | 2.607 | 9.240  | 3.333 |
| ND860-2                | 1.500 | 0.137 | 5.563  | 2.000 |
| Nicolet (W2133-1)      | 1.167 | 0.103 | 3.257  | 1.667 |
| Norchip                | 2.333 | 0.230 | 8.073  | 2.667 |
| NorDonna               | 4.000 | 1.620 | 6.320  | 2.333 |
| Northstar              | 2.333 | 0.793 | 5.330  | 3.333 |
| NorValley              | 1.333 | 0.510 | 4.370  | 2.333 |
| Norwis (FL 657)        | 1.833 | 0.463 | 5.430  | 2.667 |
| NY115                  | 1.167 | 0.173 | 5.927  | 2.667 |
| NY121                  | 2.333 | 0.623 | 7.153  | 1.333 |
| NY136                  | 2.833 | 0.420 | 6.907  | 3.333 |
| NY140                  | 2.167 | 0.943 | 5.750  | 3.333 |
| NY142                  | 4.167 | 5.093 | 11.823 | 2.333 |
| NYE48-2                | 1.000 | 0.167 | 3.697  | 3.333 |
| Ontario                | 3.333 | 3.160 | 7.023  | 2.667 |
| OR00068-11             | 2.500 | 1.013 | 9.103  | 2.667 |
| PA99N82-4              | 2.967 | 1.134 | 6.492  | 3.503 |
| Patagonia (NDSU 2)     | 3.667 | 2.203 | 7.567  | 4.333 |
| Peter Wilcox           | 2.000 | 0.720 | 5.787  | 3.333 |
| Pike                   | 1.167 | 0.100 | 3.633  | 2.333 |
| POR01PG1-6             | NA    | 0.613 | 6.297  | 4.994 |
| POR01PG16-1            | 1.833 | 1.173 | 7.507  | 5.000 |
| POR01PG22-1            | 2.500 | 0.794 | 4.637  | 5.000 |
| POR02PG37-2            | 2.667 | 1.170 | 7.903  | 2.667 |
| Premier Russet         | 1.833 | 0.167 | 8.263  | 4.333 |
| Prince Hairy (NY235-4) | 2.667 | 1.757 | 6.700  | 2.000 |
| Purple Majesty         | 1.667 | 0.287 | 6.290  | 3.333 |
| Purple Peruvian        | 1.667 | 2.313 | 9.317  | 5.000 |

|                                     |       |       |        |       |
|-------------------------------------|-------|-------|--------|-------|
| Ranger Russet                       | 3.000 | 0.577 | 8.363  | 5.000 |
| Reba                                | 1.333 | 0.317 | 4.823  | 3.333 |
| Red Maria (NY129)                   | 3.167 | 1.780 | 7.243  | 2.333 |
| Reeves Kingpin                      | 3.167 | 3.233 | 6.520  | 5.000 |
| Rideau                              | 3.167 | 1.263 | 8.643  | 2.667 |
| Rochdale Gold- Doree                | 3.000 | 1.460 | 7.487  | 2.000 |
| Rosa                                | 2.167 | 0.430 | 6.807  | 2.667 |
| Russet Burbank                      | 2.667 | 0.980 | 6.937  | 4.667 |
| Russet Norkotah-S3                  | 3.167 | 2.233 | 8.163  | 4.333 |
| Russet Norkotah-S8                  | 3.500 | 2.160 | 6.167  | 4.333 |
| Salem                               | 3.167 | 2.653 | 9.317  | 3.333 |
| Satina                              | 3.500 | 3.177 | 6.960  | 2.667 |
| Sebago                              | 3.000 | 4.703 | 6.027  | 2.667 |
| Sierra Gold                         | 2.667 | 0.517 | 6.420  | 3.333 |
| Silverton Russet                    | 2.500 | 0.797 | 5.013  | 5.000 |
| Snowden                             | 1.167 | 0.127 | 4.277  | 2.000 |
| Superior                            | 2.833 | 2.387 | 6.607  | 2.667 |
| TrailBlazer Russet (ROND95249-Russ) | 1.833 | 0.340 | 5.147  | 4.333 |
| Tundra (W2310-3)                    | 1.000 | 0.120 | 4.357  | 2.333 |
| Umatilla Russet                     | 2.500 | 2.497 | 6.087  | 5.000 |
| V1102-1                             | 3.667 | 2.373 | 10.907 | 4.333 |
| V1115-3                             | 2.667 | 1.117 | 5.257  | 4.333 |
| Villetta Rose                       | 3.167 | 1.300 | 5.230  | 2.667 |
| W1151rus                            | 3.333 | 4.800 | 7.500  | 5.000 |
| W2253-5rus                          | 3.500 | 2.907 | 8.383  | 4.333 |
| W2309-7                             | 1.000 | 0.153 | 4.087  | 3.333 |
| W2683-2rus                          | 2.333 | 0.653 | 7.763  | 5.000 |
| W4013-1                             | 1.167 | 0.137 | 4.877  | 2.333 |
| Wallowa Russet                      | 2.667 | 0.523 | 6.663  | 5.000 |
| Waneta (NY138)                      | 1.167 | 0.140 | 3.870  | 3.333 |
| Western russet                      | 3.000 | 1.030 | 6.427  | 4.333 |
| White Pearl                         | 1.000 | 0.101 | 3.158  | 2.500 |
| Willamette                          | 1.067 | NA    | 4.107  | NA    |
| Winema                              | 3.167 | 2.307 | 6.123  | 3.333 |
| Yankee Chipper                      | 2.000 | 0.287 | 5.457  | 3.667 |
| Yukon Gem                           | 1.833 | 0.603 | 5.227  | 3.333 |
| Yukon Gold                          | 3.333 | 1.210 | 7.190  | 3.000 |
| Rio Grande Russet                   | 3.000 | 1.373 | 7.333  | 5.000 |
| Atlantic                            | 1.333 | 0.143 | 4.660  | 2.000 |
