# Supplementary material for: Retrospective View of North American Potato (Solanum tuberosum L.) Breeding in the 20th and 21st Centuries
Source: PubMed Central journal article supplement (PMC3689798; doi:10.1534/g3.113.005595), 2013-06-01
Supplement: supp_g3.113.005595_TableS10.pdf [file supp_g3.113.005595_TableS10.pdf]

**Table S10** Summary of single nucleotide polymorphisms (SNPs) in carotenoid biosynthetic pathway genes tested for significant differences in allele or genotype composition compared to that observed in all other cultivated potato lines. SNPs with a p-value $\leq$ 0.05 were considered significant.

| <b>PGSC Gene</b>     | <b>Annotation</b>                                            | <b>Significant Allele Frequency<br/>(Significant SNPs / Total SNPs)</b> | <b>Significant Genotype Frequency<br/>(Significant SNPs / Total SNPs)</b> |
|----------------------|--------------------------------------------------------------|-------------------------------------------------------------------------|---------------------------------------------------------------------------|
| PGSC0003DMG400013335 | pTOX - alternative oxidase<br>CHY1 - beta-carotene           | 0/1                                                                     | 0/1                                                                       |
| PGSC0003DMG400028897 | hydroxylase                                                  | 1/1                                                                     | 1/1                                                                       |
| PGSC0003DMG400008159 | LCY-b - lycopene beta cyclase,<br>chloroplastic              | 0/3                                                                     | 0/3                                                                       |
| PGSC0003DMG400010637 | LCY-b - lycopene beta cyclase,<br>chloroplastic              | 0/2                                                                     | 1/2                                                                       |
| PGSC0003DMG400009156 | PDS - phytoene dehydrogenase,<br>chloroplastic/chromoplastic | 0/2                                                                     | 1/2                                                                       |
| PGSC0003DMG400028224 | CrtISO - carotenoid isomerase,<br>chloroplastic              | 0/2                                                                     | 0/2                                                                       |
| PGSC0003DMG400022473 | ZDS - zeta-carotene desaturase                               | 2/4                                                                     | 1/4                                                                       |
| PGSC0003DMG400000333 | LCY-e - lycopene epsilon cyclase                             | 0/3                                                                     | 1/3                                                                       |
